# Supplementary material for: Environmental Life Cycle Assessment of Diets with Improved Omega-3 Fatty Acid Profiles
Source: PLoS One. 2016 Aug 9;11(8):e0160397. doi: 10.1371/journal.pone.0160397 (PMC4978454; doi:10.1371/journal.pone.0160397)
Supplement: S2 Table — ADG: Average Daily weight Gain. (XLSX) [file pone.0160397.s003.xlsx]

## Sheet: Cover page
Environmental Life cycle assessment of diets with improved omega-3 fatty acid profiles
Carla R. V. Coelho, Franck Pernollet, Hayo M. G. van der Werf*
SAS, Agrocampus Ouest, INRA, Rennes, France
e-mail: hayo.van-der-werf@inra.fr
S2 Table. Modifications in the composition of animal rations (as percentage-point decrease or increase in mass) and animal-production changes per animal type for life cycle inventories of production systems providing higher omega-3 levels, compared to life cycle inventories of AGRIBALYSE 1.1 production systems. ADG: Average Daily weight Gain.

## Sheet: S2 Table
S2 Table Modifications in the composition of animal rations (as percentage-point decrease or increase in mass) and animal-production changes per animal type for life cycle inventories of production systems providing higher omega-3 levels, compared to life cycle inventories of AGRIBALYSE 1.1 production systems. ADG: Average Daily weight Gain.
product type	AGRIBALYSE 1.1 animal category life cycle inventory	sub-category	percentage-point decrease	percentage-point increase	animal-production improvments	references for animal-production improvements
Milk	Milk, lowland milk system, silage maize more than 30%, conv prod, CI, at farm gate/FR U		soya bean meal 3.7; wheat 2.1	rapeseed meal 4.6; linseed 1.4	Reduction in enteric CH4 emissions by 6%	Reduction in CH4 enteric emissions according to Doreau et al. [1]. Improvements for goats were validated by experts at INRA. The ADG of 10% was obtained from Normand et al. [2] and validated by experts at INRA.
	Sheep milk, conventional, Roquefort system, at farm gate/FR U		barley 0.35	extruded linseed 0.25	Reduction in enteric CH4 emissions by 1.4%
	Goat milk, conventional, intensive forage area, at farm gate/FR U		barley 3.0; maize 0.5;	extruded linseed 2.9	Reduction in enteric CH4 emissions by 7.2%
Beef	Cull cow, lowland milk system, silage maize more than 30%, conv prod, at farm gate/FR U	Veal	soya bean meal 7.6; maize 6; barley 2.7; wheat 2	rapeseed meal 9.9; extruded linseed 8; sunflower meal 0.4	Reduction in enteric CH4 emissions by 7.8%
		Heifer			Reduction in enteric CH4 emissions by 1.6%
	Young dairy bull, fattening syst, conv prod, CI, at farm gate/FR U	Only for the stage between 1 and 2 years	soya bean meal 5; wheat 6	rapeseed meal 6.5. extruded linseed 3.4	Reduction in enteric CH4 emission by 15.7% Increase in ADG by 10% during finishing stage (100 days)
	Suckler cull cow,suckler cow syst,less than 1.2 LU per ha,conv prod, at farm gate/FR U	Only for finishing stage	soya bean meal 1.8; wheat 4.0	rapeseed meal 2.0; extruded linseed 2.7	Reduction in enteric CH4 emissions by 6.9% during the finishing stage (75 days) Increase in ADG by 10% during finishing stage (75 days)
	Suckler cull cow, suckler cow syst, more than 1.2 LU per ha, conv prod, at farm gate/FR U	Only for finishing stage	soya bean meal 0.3; wheat 5.3	extruded linseed 3.5	Reduction in enteric CH4 emissions by 10% during the finishing stage (83 days) Increase in ADG by 10% during the finishing stage (83 days)
	Suckler heifer, fattening syst, more than 1.2 LU per ha, conv prod, CI, at farm gate/FR U	Only for finishing stage (once 2 years old)	wheat 1.8	extruded linseed 1.3	Reduction in enteric CH4 emissions by 5.7% during the finishing stage (100 days) Increase in ADG by 10% during the finishing stage (100 days)
	Young suckler bull, fattening syst, less than 1.2 LU per ha, conv prod, CI, at farm gate/FR U	Only for the stage between 1 and 2 years	soya bean meal 2.8; wheat 2.1	rapeseed meal 3.5; extruded linseed 1.4	Reduction in enteric CH4 emissions by 7.6% Increase in ADG by 10% during the finishing stage (100 days)
	Young suckler bull, fattening syst, more than 1.2 LU per ha, conv prod, CI, at farm gate/FR U	Only for the stage between 1 and 2 years	soya bean meal 10.7; wheat 6.4	rapeseed meal 13.4; extruded linseed 4.3	Reduction in enteric CH4 emissions by 16.1% Increase in ADG by 10% during the finishing period (100 days)
Monogastrics and eggs	Rabbit, conventional, in cage, at farm gate/FR U		wheat 3.3	linseed 2.3. lucerne 0.3
	Broiler, conventional, at farm gate/FR U		maize 4.3; soya bean meal 19.6; wheat 1.9; palm oil 0.3	rapeseed meal 23.7; linseed 2.5
	Egg, indoor system, cage, conv prod, CI, at farm gate/FR U		maize 4.4; soya bean meal 15.6; wheat 1.7	rapeseed meal 18.9; linseed 3.0
	Pig, conventional, national average, at farm gate/FR U	piglet feed	wheat 4.2; soya bean meal 12.5; barley 0.3	rapeseed meal 15.5; linseed 2.0	Increase in survival rate of piglets by 7.3% Reduction in feed intake of sows by 5% Increase in ADG by 2.06%	[3-6]
		fattening feed	wheat 0.9; soya bean meal 1.3; maize 0.8	rapeseed meal 1.5; linseed 2.0
		finishing feed	wheat 0.8; maize 0.8; rapeseed meal 0.3	linseed 2.0

## Sheet: References
References
1.	Doreau M, Martin C, Eugène M, Popova M, Morgavi DP. Leviers d’action pour réduire la production de méthane entérique par les ruminants. INRA Productions Animales. 2011;24(5):461-74.
2.	Normand J, Quinsac A, Doreau M. Incidence d'un apport alimentaire d'acides gras polyinsaturés en cours d'engraissement sur les performances zootechniques et les qualités des viandes de gros bovins - Compte rendu final n° 17 06 32 029. Institut de l'Elevage, Département Techniques d’Elevage et Qualité - Service Qualité des viandes, 2006.
3.	Quiniou N, Goues T, Mourot J, Etienne M. Effet de l'enrichissement des aliments de gestation/lactation avec 1,4% en lipides provenant d'huile de palme ou de graine de lin extrudée sur le déroulement des mises bas et la survie des porcelets. Journées de la Recherche Porcine2010. p. 137-8
4.	Quiniou N, Goues T, Mourot J, Etienne M. Effets sur la truie et sa portée d’un enrichissement en lipides des aliments par incorporation d’huile de palme ou de graines de lin. TechniPorc. 2010;33(3):9-17.
5.	Quiniou N, Goues T, Vautier A, Nassy G, Chesneau G, Weill P, et al. Consequence of extruded linseed incorporation in sows and/or pigs' diet on performance. In: Science EFfA, editor. 61st Annual Meeting of the European Association for Animal Production; Heraklion, Crete Island, Greece2010. p. 1-5.
6.	Quiniou N, Dagorn J, Gaudré D. Variation du poids des porcelets à la naissance et incidence sur les performances zootechniques ultérieures. TechniPorc. 2001;24(2):11-7.
